# Supplementary material for: Rapamycin enhances survival in a Drosophila model of mitochondrial disease
Source: PubMed Central journal article supplement (PMC5348310; doi:10.18632/oncotarget.12560), 2016-10-11
Supplement: oncotarget-07-80131-s001.pdf [file oncotarget-07-80131-s001.pdf]

## Rapamycin enhances survival in a *Drosophila* model of mitochondrial disease

### Supplemental Material

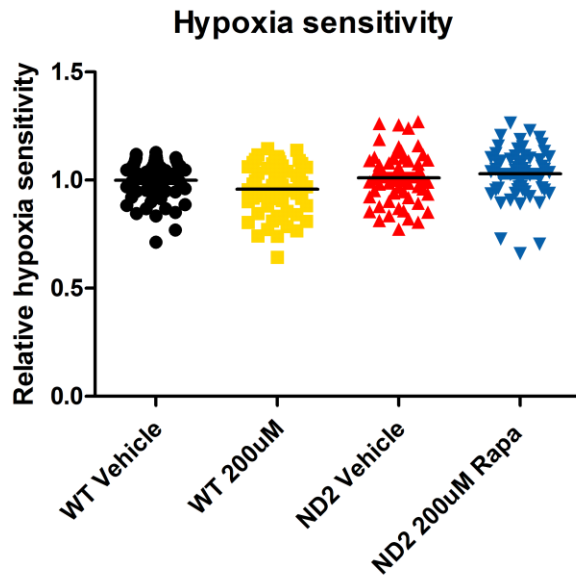

**Figure S1. Sensitivity to anoxia-induced paralysis is not affected by genotype or rapamycin treatment.** Exposure of 15d old flies to 99.995% nitrogen causes a hypoxia-induced paralysis. Cohorts of fifteen 15 day old flies were placed in airtight flask, allowed to acclimate and then exposed to 99.995% nitrogen. Time to paralysis for each fly was measured and normalized to the mean time of WT Vehicle control to account for day-to-day differences. Experiment was replicated four times.

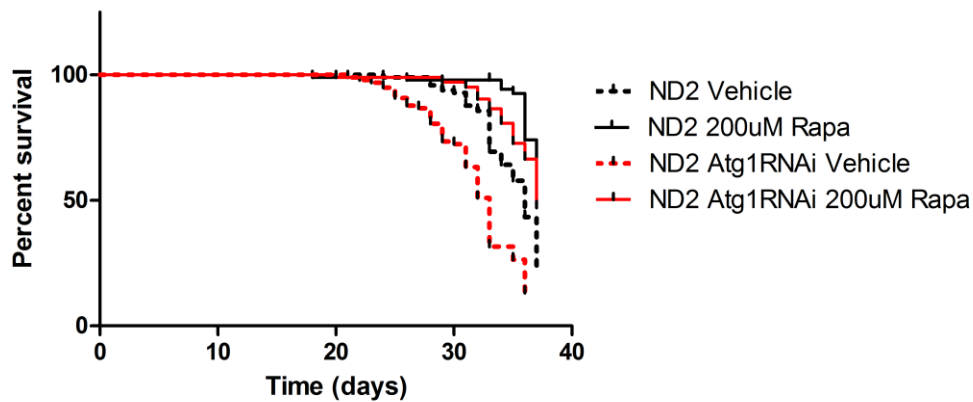

**Figure S2. Rapamycin extends lifespan in ND2 mutant flies in an autophagy-independent manner.** Independent lifespan analysis supports a decreased lifespan in ND2 mutant flies that have knocked down autophagy (dashed red line) versus ND2 mutant flies heterozygous for only the transgene (dashed black line),  $p < 0.001$ . ND2 flies with knocked down autophagy (dashed red line) are still responsive to rapamycin-induced lifespan extension (solid red line),  $p < 0.001$ . Experiment was truncated due to media contamination. All analyses were carried out prior to contamination and all flies still alive were treated as censored.
